# Supplementary material for: Digital Healthy Diet Literacy and Fear of COVID-19 as Associated with Treatment Adherence and Its Subscales among Hemodialysis Patients: A Multi-Hospital Study
Source: MDPI journal article supplement (doi:10.3390/nu15102292), 2023-05-12
Supplement: s1 [file s1]

*Supplementary Materials*

# **Digital Healthy Diet Literacy and Fear of COVID-19 as Associated with Treatment Adherence and Its Subscales among Hemodialysis Patients: A Multi-Hospital Study**

Lan T. H. Le, Tu T. Tran, Tuyen Van Duong, Loan T. Dang, Trung A. Hoang, Dung H. Nguyen, Minh D. Pham, Binh N. Do, Hoang C. Nguyen, Linh V. Pham, Lien T. H. Nguyen, Hoi T. Nguyen, Nga T. Trieu, Thinh V. Do, Manh V. Trinh, Tung H. Ha, Dung T. Phan, Thao T. P. Nguyen, Kien T. Nguyen and Shwu-Huey Yang

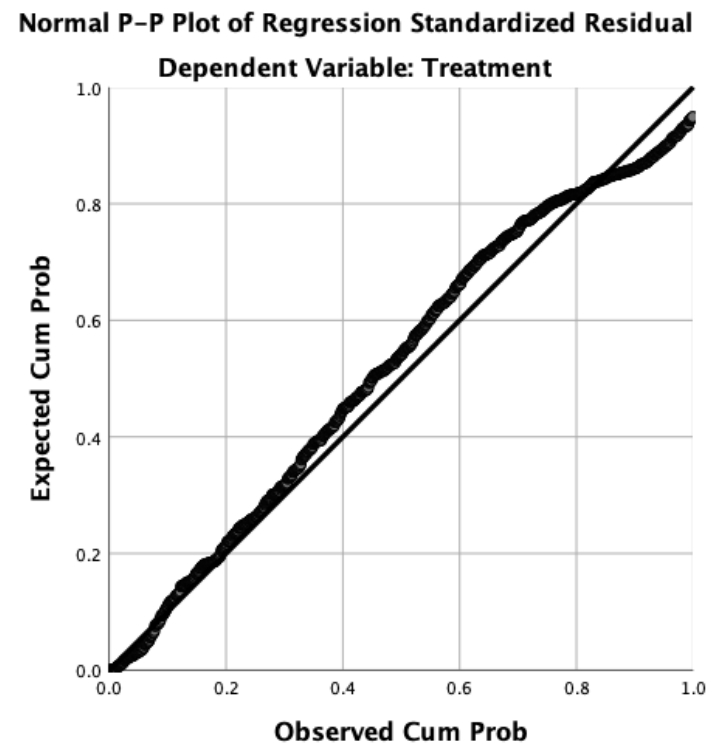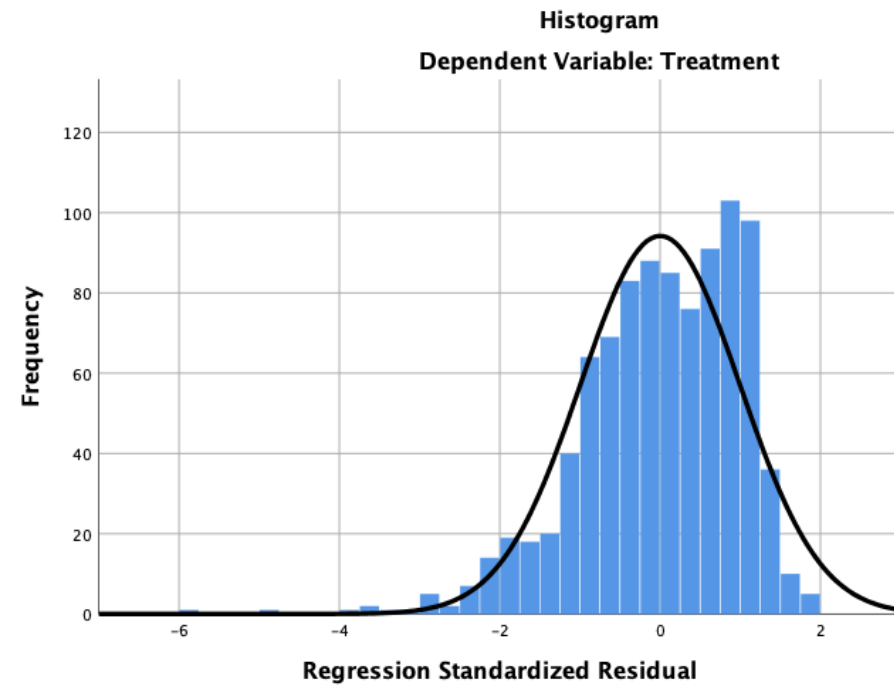

**Figure S1.** The assumption checked for linear regression models of treatment adherence. Normality: The residuals follow a normal distribution

**Table S1.** The correlations between the independent variable (Treatment Adherence).

|                            | Age    | Education | Working Status | Social Status | Medication Payment Ability | S. COVID 19-S | HD Vintage | CCI    | HL     | DDL    | Fear of Covid-19 |
|----------------------------|--------|-----------|----------------|---------------|----------------------------|---------------|------------|--------|--------|--------|------------------|
| Age                        | 1.000  |           |                |               |                            |               |            |        |        |        |                  |
| Education                  | -0.093 | 1.000     |                |               |                            |               |            |        |        |        |                  |
| Working Status             | -0.030 | 0.350     | 1.000          |               |                            |               |            |        |        |        |                  |
| Social Status              | -0.030 | 0.317     | 0.212          | 1.000         |                            |               |            |        |        |        |                  |
| Medication Payment Ability | 0.043  | 0.189     | 0.148          | 0.287         | 1.000                      |               |            |        |        |        |                  |
| S. COVID 19-S              | 0.077  | 0.038     | 0.087          | -0.024        | 0.063                      | 1.000         |            |        |        |        |                  |
| HD Vintage                 | -0.013 | -0.001    | -0.041         | 0.016         | -0.060                     | -0.114        | 1.000      |        |        |        |                  |
| CCI                        | 0.192  | 0.003     | 0.030          | -0.111        | -0.145                     | 0.211         | -0.018     | 1.000  |        |        |                  |
| HL                         | -0.155 | 0.236     | 0.166          | 0.181         | 0.212                      | 0.050         | -0.037     | -0.117 | 1.000  |        |                  |
| DDL                        | -0.146 | 0.251     | 0.140          | 0.081         | 0.170                      | -0.006        | -0.018     | -0.141 | 0.747  | 1.000  |                  |
| Fear of Covid 19           | 0.016  | -0.027    | 0.013          | -0.139        | -0.254                     | -0.121        | 0.014      | 0.181  | -0.108 | -0.051 | 1.000            |

Abbreviation: S-COVID-19-S, suspected COVID-19 symptoms; HD, Hemodialysis; CCI, Charlson Comorbidity Index.; HL, Health literacy; DDL, digital health diet literacy; HDK, hemodialysis dietary knowledge.

**Table S2.** Associate factors of adherence to hemodialysis treatment, medication, fluid, and diet via bivariate linear regression analysis.

|                             | Hemodialysis Treatment   |        | Medication              |        | Fluid and Diet         |        |
|-----------------------------|--------------------------|--------|-------------------------|--------|------------------------|--------|
|                             | B (95% CI)               | p      | B (95% CI)              | p      | B (95% CI)             | p      |
| Age                         |                          |        |                         |        |                        |        |
| 19-59                       |                          |        |                         |        |                        |        |
| 60-85                       | 2.79 (-7.11, 12.70)      | 0.580  | 2.70 (-0.79, 6.27)      | 0.129  | 13.23 (0.78, 25.68)    | 0.037  |
| Gender                      |                          |        |                         |        |                        |        |
| Male                        |                          |        |                         |        |                        |        |
| Female                      | -7.07 (-16.83, 2.69)     | 0.155  | -0.57 ( -4.05, 2.91)    | 0.747  | 3.66 ( -8.61, 15.94)   | 0.588  |
| Education                   |                          |        |                         |        |                        |        |
| Illiterate or elementary    |                          |        |                         |        |                        |        |
| Junior high school          | -23.83 ( -36.13, -11.52) | <0.001 | -1.75 ( -5.95, 2.44)    | 0.412  | -3.42 (-18.68, 11.83)  | 0.660  |
| Senior high school or above | 2.07 ( -11.05, 15.20)    | 0.756  | 5.75 (1.28, 10.22)      | 0.012  | 33.71 (17.42, 49.99)   | 0.001  |
| Working status              |                          |        |                         |        |                        |        |
| Not working                 |                          |        |                         |        |                        |        |
| Working                     | 0.03 ( -10.84, 10.91)    | 0.995  | -1.79 ( -5.47, 1.87)    | 0.337  | 12.74 (0.01, 25.46)    | 0.050  |
| Married status              |                          |        |                         |        |                        |        |
| Never married               |                          |        |                         |        |                        |        |
| Ever married                | -3.21 ( -20.37, 13.96)   | 0.714  | -1.88 ( -8.01, 4.23)    | 0.548  | 11.18 ( -10.34, 32.71) | 0.308  |
| Social status               |                          |        |                         |        |                        |        |
| Low                         |                          |        |                         |        |                        |        |
| Middle and high             | 0.03 ( -10.84, 10.91)    | 0.995  | 8.07 (4.22, 11.92)      | <0.001 | 26.05 (12.78, 39.32)   | 0.001  |
| Medication payment ability  |                          |        |                         |        |                        |        |
| Very or fairly difficult    |                          |        |                         |        |                        |        |
| Very or fairly easy         | 11.18 ( -0.21, 22.59)    | 0.055  | 7.46 (3.41, 11.51)      | <0.001 | 35.81 (21.76, 49.86)   | 0.001  |
| S-COVID-19-S                |                          |        |                         |        |                        |        |
| Without S-COVID-19-S        |                          |        |                         |        |                        |        |
| With S-COVID-19-S           | 1.37 ( -12.21, 14.95)    | 0.843  | - 9.74 ( -14.54, -4.94) | <0.001 | 34.72 (17.76, 51.67)   | <0.001 |
| BMI, kg/m <sup>2</sup>      |                          |        |                         |        |                        |        |
| BMI < 24                    |                          |        |                         |        |                        |        |
| BMI ≥ 24                    | 1.52 ( -15.13, 18.18)    | 0.858  | -3.05 ( -8.97, 2.87)    | 0.312  | 12.33 ( -8.43, 33.09)  | 0.244  |
| HD vintage, year            |                          |        |                         |        |                        |        |

|                  |                          |        |                        |        |                         |        |
|------------------|--------------------------|--------|------------------------|--------|-------------------------|--------|
| < 5              |                          |        |                        |        |                         |        |
| ≥ 5              | -22.15 ( -31.84, -12.46) | <0.001 | -8.74 ( -12.19, -5.29) | <0.001 | -27.24 (-39.45, -15.04) | <0.001 |
| CCI              | -3.17 ( -6.02, -0.33)    | 0.029  | -0.71 ( -1.73, 0.31)   | 0.172  | -1.52 ( -5.11, 2.06)    | 0.406  |
| HL index         | 0.16 ( -0.35, 0.67)      | 0.537  | 0.18 (0.00, 0.37)      | 0.047  | 1.61 (0.96, 2.24)       | 0.001  |
| DDL index        | 0.22 ( -0.19, 0.63)      | 0.301  | 0.22 (0.07, 0.37)      | 0.003  | 1.12 (0.61, 1.64)       | 0.001  |
| HDK              | 1.89 ( -0.21, 4.00)      | 0.078  | 0.89 (0.14, 1.64)      | 0.02   | -2.71 (-5.37, -0.06)    | 0.045  |
| Fear of COVID-19 | -0.26 ( -1.07, 0.54)     | 0.517  | -0.21 ( -0.49, 0.08)   | 0.159  | -2.57 ( -3.57, -1.56)   | 0.001  |

Abbreviation: B, regression coefficient; CI, confidence interval; BMI, body mass index; S-COVID-19-S, suspected Covid-19 symptoms; HD, Hemodialysis; HL, health Literacy; DDL, digital health diet literacy; HDK, hemodialysis dietary knowledge; CCI, Charlson Comorbidity Index.

**Table S3.** The correlations between the independent variable (Hemodialysis treatment).

|                            | <b>Gender</b> | <b>Education</b> | <b>Medication Payment<br/>Ability</b> | <b>HD Vintage</b> | <b>HDK</b> | <b>CCI</b> |
|----------------------------|---------------|------------------|---------------------------------------|-------------------|------------|------------|
| Gender                     | 1.000         |                  |                                       |                   |            |            |
| Education level            | -0.085        | 1.000            |                                       |                   |            |            |
| Medication Payment Ability | -0.047        | 0.189            | 1.000                                 |                   |            |            |
| HD Vintage                 | 0.042         | -0.001           | -0.060                                | 1.000             |            |            |
| HDK                        | -0.011        | -0.085           | 0.155                                 | 0.087             | 1.000      |            |
| CCI                        | 0.019         | 0.003            | -0.145                                | -0.018            | -0.131     | 1.000      |

Abbreviation: HD, Hemodialysis; CCI, Charlson Comorbidity Index; HDK, hemodialysis dietary knowledge.

**Table S4.** The correlations between the independent variable (Medication treatment).

|                            | Age    | Education | Social Status | Medication Payment Ability | S. COVID19 | HD Vintage | CCI    | HL     | DDL    | Fear COVID | HDK   |
|----------------------------|--------|-----------|---------------|----------------------------|------------|------------|--------|--------|--------|------------|-------|
| Age                        | 1.000  |           |               |                            |            |            |        |        |        |            |       |
| Education level            | -0.093 | 1.000     |               |                            |            |            |        |        |        |            |       |
| Social Status              | -0.030 | 0.317     | 1.000         |                            |            |            |        |        |        |            |       |
| Medication Payment Ability | 0.043  | 0.189     | 0.287         | 1.000                      |            |            |        |        |        |            |       |
| S. COVID 19                | 0.077  | 0.038     | -0.024        | 0.063                      | 1.000      |            |        |        |        |            |       |
| HD Vintage                 | -0.013 | -0.001    | 0.016         | -0.060                     | -0.114     | 1.000      |        |        |        |            |       |
| CCI                        | 0.192  | 0.003     | -0.111        | -0.145                     | 0.211      | -0.018     | 1.000  |        |        |            |       |
| HL                         | -0.155 | 0.236     | 0.181         | 0.212                      | 0.050      | -0.037     | -0.117 | 1.000  |        |            |       |
| DDL                        | -0.146 | 0.251     | 0.081         | 0.170                      | -0.006     | -0.018     | -0.141 | 0.747  | 1.000  |            |       |
| Fear Covid                 | 0.016  | -0.027    | -0.139        | -0.254                     | -0.121     | 0.014      | 0.181  | -0.108 | -0.051 | 1.000      |       |
| HDK                        | 0.050  | -0.085    | 0.037         | 0.155                      | -0.036     | 0.087      | -0.131 | 0.165  | 0.181  | -0.020     | 1.000 |

Abbreviation: S-COVID-19-S, suspected COVID-19 symptoms; HD, Hemodialysis; CCI, Charlson Comorbidity Index; HL, Health literacy; DDL, digital health diet literacy; HDK, hemodialysis dietary knowledge.

**Table S5.** The correlations between the independent variable (Fluid and Diet).

|                            | Age    | Education | Social Status | Medication Payment Ability | S. COVID19 | HD Vintage | HL     | DDL    | Fear COVID | Working status | HDK   |
|----------------------------|--------|-----------|---------------|----------------------------|------------|------------|--------|--------|------------|----------------|-------|
| Age                        | 1.000  |           |               |                            |            |            |        |        |            |                |       |
| Education level            | -0.093 | 1.000     |               |                            |            |            |        |        |            |                |       |
| Social Status              | -0.030 | 0.317     | 1.000         |                            |            |            |        |        |            |                |       |
| Medication Payment Ability | 0.043  | 0.189     | 0.287         | 1.000                      |            |            |        |        |            |                |       |
| S. COVID 19                | 0.077  | 0.038     | -0.024        | 0.063                      | 1.000      |            |        |        |            |                |       |
| HD Vintage                 | -0.013 | -0.001    | 0.016         | -0.060                     | -0.114     | 1.000      |        |        |            |                |       |
| HL                         | -0.155 | 0.236     | 0.181         | 0.212                      | 0.050      | -0.037     | 1.000  |        |            |                |       |
| DDL                        | -0.146 | 0.251     | 0.081         | 0.170                      | -0.006     | -0.018     | 0.747  | 1.000  |            |                |       |
| Fear Covid                 | 0.016  | -0.027    | -0.139        | -0.254                     | -0.121     | 0.014      | -0.108 | -0.051 | 1.000      |                |       |
| Working status             | -0.03  | 0.35      | 0.212         | 0.148                      | 0.087      | -0.041     | 0.166  | 0.14   | 0.013      | 1.000          |       |
| HDK                        | 0.05   | -0.085    | 0.037         | 0.155                      | -0.036     | 0.087      | 0.165  | 0.181  | -0.02      | 0.021          | 1.000 |

Abbreviation: S-COVID-19-S, suspected COVID-19 symptoms; HD, Hemodialysis; HL, Health literacy; DDL, digital health diet literacy; HDK, hemodialysis dietary knowledge.
